# Supplementary material for: Cuidar a los diabéticos al margen de la Atención Primaria
Source: JCI journal article supplement (doi:10.1172/jci96185), 1993-01-01
Supplement: sd1 [file 1]

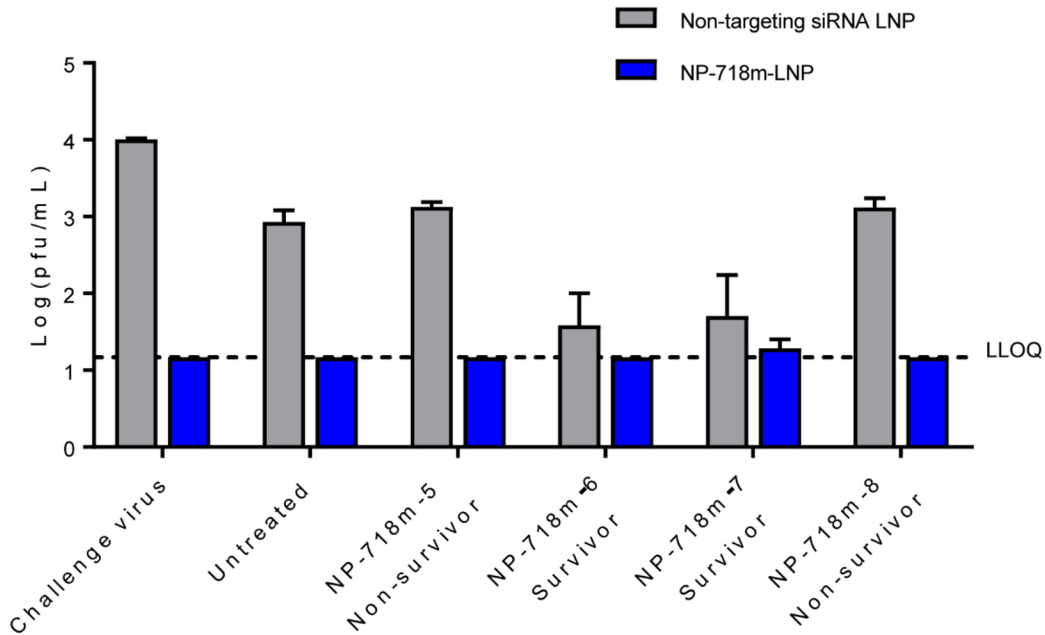

**Supplementary Figure 1. NP-718m-LNP treatment of viral isolates from survivor and non-survivor animals show comparable antiviral activity.** HepG2 cells were infected with virus isolated from MARV-infected animals at 5 days post-infection and treated with either NP-718m-LNP or a non-targeting siRNA LNP negative control. Data are means  $\pm$  SEM of technical duplicates from one experiment. LLOQ = 1.17 log(pfu/mL).
